# Supplementary material for: Structure–Biodegradability Relationship of Nonylphenol Isomers in Two Soils with Long-Term Reclaimed Water Irrigation
Source: MDPI journal article supplement (doi:10.3390/w14081258), 2022-04-13
Supplement: s1 [file s1]

## Supporting Information:

Table S1. Names, structures, side chain lengths and substituents of 4-NP isomers.

|                  | Structures                                                                          | Nomenclature                           | The length of side chain | $\alpha$ substitute | $\beta$ substitute |
|------------------|-------------------------------------------------------------------------------------|----------------------------------------|--------------------------|---------------------|--------------------|
| NP <sub>1</sub>  | 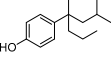   | 4-[1,3-dimethyl-1-n-propylbutyl]phenol | 4                        | Me, Pr              | Et                 |
| NP <sub>2</sub>  |    | 4-[1,1,3-trimethylhexyl]phenol         | 6                        | Me, Me              | None               |
| NP <sub>3</sub>  |    | 4-[1-ethyl-1,4-dimethylpentyl]phenol   | 5                        | Me, Et              | Me                 |
| NP <sub>4</sub>  |    | 4-[1-ethyl-1,3-dimethylpentyl]phenol   | 5                        | Me, Et              | Me                 |
| NP <sub>5</sub>  |    | 4-[1,1,4-trimethylhexyl]phenol         | 6                        | Me, Me              | None               |
| NP <sub>6</sub>  |    | 4-[1-ethyl-1,3-dimethylpentyl]phenol   | 5                        | Me, Et              | Me                 |
| NP <sub>7</sub>  |  | 4-[2-ethyl-1,1-dimethylpentyl]phenol   | 5                        | Me, Me              | Et                 |
| NP <sub>8</sub>  |  | 4-[1,2-dimethyl-1-n-propylbutyl]phenol | 4                        | Me, Pr              | Me, Et             |
| NP <sub>9</sub>  |  | 4-[1-ethyl-1,2-dimethylpentyl]phenol   | 5                        | Me, Et              | Me, Me             |
| NP <sub>10</sub> |  | 4-[1,2-dimethyl-1-n-propylbutyl]phenol | 4                        | Me, Pr              | Me, Et             |
| NP <sub>11</sub> |  | 4-[1,1,2-trimethylhexyl]phenol         | 6                        | Me, Me              | Me                 |
| NP <sub>12</sub> |  | 4-[1-ethyl-1,2-dimethylpentyl]phenol   | 5                        | Me, Et              | Me, Me             |

*a: Me represents methyl; Et represents ethyl; Pr represents propyl; i-Pr represents isopropyl.*

Table S2. The physicochemical properties of the soils

|               | China soil | Florida soil |
|---------------|------------|--------------|
| pH            | 7.88       | 6.20         |
| CEC (cmol/kg) | 6.88       | 4.20         |
| TOM (%)       | 4.77       | 15.37        |

Note: TOM indicates total organic matter. CEC: Cation exchange capacity.

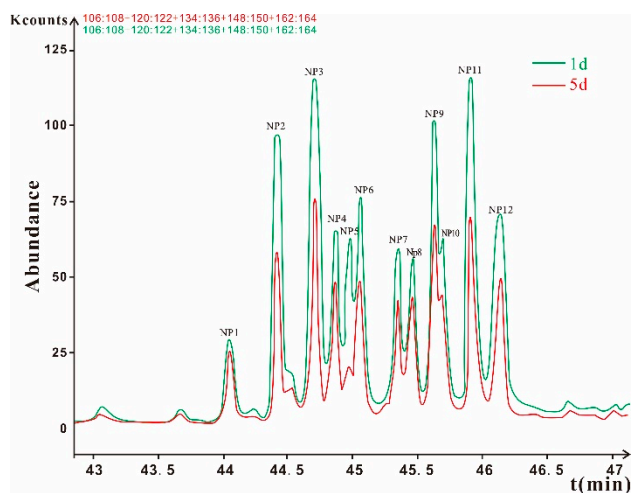

Fig. S1. Spectra of NP isomers during degradation in CN soil on the 1st and 5th day

Table S3. Molecular connection index of NP isomers

|                 | NP1   | NP2   | NP3   | NP4   | NP5   | NP6   | NP7  | NP8   | NP9   | NP10  | NP11  | NP12  |
|-----------------|-------|-------|-------|-------|-------|-------|------|-------|-------|-------|-------|-------|
| $^1\chi^v$      | 6.273 | 6.452 | 6.633 | 6.339 | 6.254 | 6.339 | 6.32 | 6.21  | 6.58  | 6.21  | 6.28  | 6.58  |
| $^2\chi^v$      | 4.347 | 5.009 | 5.94  | 4.564 | 5.2   | 4.564 | 5.58 | 5.023 | 6.193 | 5.023 | 5.026 | 6.193 |
| $^4\chi^v_{pc}$ | 4.036 | 4.487 | 5.54  | 3.937 | 3.48  | 3.937 | 4.62 | 4.12  | 5.12  | 4.12  | 3.22  | 5.12  |

Table S4. Steric hindrance and  $I_{dwbar}$  of NP isomers

|             | NP1   | NP2   | NP3   | NP4   | NP5   | NP6   | NP7   | NP8   | NP9   | NP10  | NP11  | NP12  |
|-------------|-------|-------|-------|-------|-------|-------|-------|-------|-------|-------|-------|-------|
| Steric      | 1.496 | 1.456 | 1.481 | 1.488 | 1.448 | 1.488 | 1.488 | 1.517 | 1.510 | 1.517 | 1.477 | 1.510 |
| $I_{dwbar}$ | 6.718 | 6.686 | 6.700 | 6.709 | 6.679 | 6.709 | 6.710 | 6.724 | 6.714 | 6.724 | 6.688 | 6.714 |
